# Supplementary material for: Contribution of families using the GenIDA database to the description of MED13L syndrome and literature review
Source: Springer Nature journal article supplement (doi:10.1186/s11689-025-09618-4), 2025-05-19
Supplement: MOESM1 [file 11689_2025_9618_MOESM1_ESM.pdf]

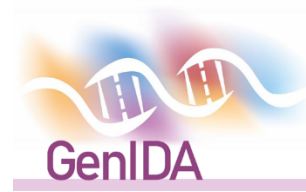

**GENIDA – Questionnaire GenIDA (20 Oct. 2016 release).**

**OPEN QUESTIONS**

1/46. What is the major problem that affects your relative's everyday life (quality of life)?  
(Even if it seems unrelated to the genetic condition.) *(Free answer)*

2/46. What is the major behavioral / cognitive problem that affects your relative's and the family life? *(Free answer)*

3/46. Did your relative suffer a major medical problem or discomfort following specific medication?  
(Specify drug and length of treatment) *(Free answer)*

4/46. What are the major medical problems that occurred until now? (Indicate at what age for each) *(Free answer)*

5/46. Please state your relative's strengths *(Free answer)*

**WEIGHT / HEIGHT**

6/46. Your relative's weight:

Unit *(select the right unit)*

Kilograms  
Pounds

At birth:

6m:

1y:

2y:

4y:

6y:

10y:

14y:

Current value:

7/46. Your relative's height:

Unit *(select the right unit)*

Centimeters  
Inches

At birth:

6m:

1y:

2y:

4y:

6y:

10y:

14y:

Current value:

8/46. Head circumference: (only if it has been measured by a clinician)

Unit *(select the right unit)*

Centimeters  
Inches

At birth:

6m:

1y:

2y:

4y:

6y:

10y:

14y:

Current value:

**PREGNANCY / EARLY LIFE / PERSONAL CARE**

9/46. Was there any problem during pregnancy, labour and/or delivery?

Yes / No / I don't know *(Single Choice)*

What words best describe them? *(Select one or more answers)*

Reduced fetal movement

Lack of fetal movement  
Low amniotic fluid  
Excessive amniotic fluid  
Increased nuchal fold thickness  
Abnormal ultrasound results  
Caesarean section  
Vacuum and/or forceps extraction  
Other: (if 'Other' is selected, please specify in free text)

10/46 Apgar scores: (only if measured by a professional)

1 min:  
5 min:  
10 min:

11/46. Has your relative experienced any health problems in his/her newborn period (first four weeks)?

Yes / No / I don't know (Single Choice)

What words best describe them? (Select one or more answers)

Signs of anoxia (lack of oxygen)  
Jaundice  
Hypotonia at birth (muscle weakness)  
Hypertonia at birth  
Feeding difficulties  
Other: (if 'Other' is selected, please specify in free text)

What treatment was performed?

Assisted ventilation  
Tube feeding  
Gastrostomy (tube connecting the stomach)  
Jejunostomy (tube connecting the small intestine)  
Other: (if 'Other' is selected, please specify in free text)

How long was the newborn hospitalized? (in days)

12/46. Developmental milestones: please mark any milestone that your relative has achieved stating his/her age (if achieved)

Sitting without support: (In months)  
Standing independently: (In months)  
Walking independently: (In months)  
First words: (In months)

13/46. Personal care:

Age (by default current age) (In years)

Your relative can: (Choose one answer for each proposition: Yes / Yes with help / No)

Actively assist with personal care?  
Wash, brush her/his teeth?  
Dress her/himself?  
Manage shoelaces?  
Use potty / toilet for urine (daytime)  
Use potty / toilet for urine (night-time)  
Use potty / toilet for faeces (daytime)  
Use potty / toilet for faeces (night-time)

How much help does she/he need during the day? (Free answer)

How much help does she/he need during the night? (Free answer)

#### INTELLECTUAL DISABILITY AND AUTISM ASPECTS

14/46. Communication ability:

Age (by default current age) (In years)

Does your relative communicate in any of the following ways?

With speech  
Vocal sounds / noises  
Gestures  
With written words  
With symbols / pictures  
Signing  
None of these choices  
Other: (if 'Other' is selected, please specify in free text)

At what age did your relative achieve the present level of communication? (In years)

Please describe any difference between what your relative understands and what she/he can express:

15/46. Speech ability:

Age (by default current age) (In years)

Single Choice

Full correct sentences

Full sentences but often incorrect

No sentence, but single words

Difficult to understand (elocution problems)

Not able to speak

Understand what is being said?

Yes / No / I don't know (Single Choice)

if you choose "Not able to speak":

Non-verbal communication:

Good expressive non-verbal communication

Poor non-verbal communication

No communication at all

Is your relative's speech likely to be understood by: (Select one or more answers)

The family

Others who meet your child for the first time

Neither the family, nor others

16/46. Reading ability:

Age (by default current age) (In years)

Single Choice

Good

Poor

Non reading

Has been diagnosed with dyslexia or dyscalculia? Yes / No / I don't know (Single Choice)

17/46. Writing ability:

Age (by default current age) (In years)

Single Choice

Good

Poor

Not able to write

18/46. Education:

Does your relative has a statement of special educational need (or equivalent)? Yes / No / I don't know (Single Choice)

What in summary does it say? (Free answer)

What learning support does your relative receive? (Free answer – e.g., one to one assistance in school, etc.)

19/46. Diagnosis of intellectual disability?

Yes / No / I don't know (Single Choice)

What is the degree of this intellectual disability?

Mild

Moderate

Severe

Profound

20/46. Has an IQ test been performed?

Yes / No / I don't know (Single Choice)

Date (By default: today)

Which test? (Free answer)

Test result: (Free answer)

21/46. Diagnosis of autism? (autism spectrum disorder)

Yes / No / I don't know (Single Choice)

22/46. Has an Autism test been performed?

Yes / No / I don't know (Single Choice)

Date (By default: today)

Which test? (Free answer)

Test result: *(Free answer)*

**23/46. Behavior problems:**

Age (by default current age) *(In years)*

Yes / No / I don't know *(Single Choice)*

What words best describe them? *(Select one answer for each proposition: Nonexistent / Mild / Moderate / Major)*

Aggressive

Self aggressiveness (self mutilation)

Impulsivity

Hyperactive

Attention deficit

Shy

Anxious

Depressive tendencies

Restricted interests

Repetitive behavior / stereotypes

Obsessions

Phobias

Diagnosed as schizophrenia

Other: *(if 'Other' is selected, please specify in free text)*

**24/46. Feeding problems:**

Age (by default current age) *(In years)*

Yes / No / I don't know *(Single Choice)*

What words best describe them? *(Select one or more answers)*

Eats too much

Craves for food

Eats only very restricted food

Does not want to eat (anorexia)

Other: *(if 'Other' is selected, please specify in free text)*

How do you evaluate its (or their) seriousness?

Major

Moderate

Mild

**25/46 How would you describe your relative's sociability?**

Age (mandatory) *(In years)*

*In each of these four cases, select : Very sociable / Average sociability / Little sociability / No interaction*

With familiar adults

With unfamiliar adults

With familiar children

With unfamiliar children

**PHYSICAL AND NEUROLOGICAL PROBLEMS**

**26/46. Walking problems:**

Age (by default current age) *(In years)*

Yes / No / I don't know *(Single Choice)*

What words best describe them? *(Select one or more answers)*

Never learned to walk

Learned to walk but stopped walking

Walk for a limited period, on a limited distance

Walk with cane or other aid

Unstable walk

Other: *(if 'Other' is selected, please specify in free text)*

How do you evaluate its (or their) seriousness?

Major

Moderate

Mild

**27/46. Tremor:**

Age (by default current age) *(In years)*

Yes / No / I don't know *(Single Choice)*

*(if 'yes', specify in free answer)*

How do you evaluate its (or their) seriousness?

Major  
Moderate  
Mild

28/46. Other mouvement disorders:

Age (by default current age) (In years)

Yes / No / I don't know (Single Choice)

What words best describe them? (Select one answer for each proposition: No / Mild / Moderate / Major / I don't know)

Abnormal movements or tics

Fine motor skills problems

Spastic paraplegia

Ataxia

Other: (if 'Other' is selected, please specify in free text)

29/46. Epilepsy: has your relative had any seizures (fits)?

Yes / No / I don't know (Single Choice)

Date (By default: today)

End of period (optional: fill only to define a period)

Does this epilepsy require constant medication? Yes / No

If you have select "yes" at the previous question: What is the name of the drug / molecule ? (If other drugs has been previously tested, please answer this question again and adjust the period of traitment)

What is (or was) the effectiveness of the drug ?

No effect

Very good

Good

Little effect

Not well tolerated

Major or significant adverse effect

Other: (if 'Other' is selected, please specify in free text)

Is this epilepsy pharmaco-resistant? Yes / No

Please describe the type(s) of epilepsy and its seriousness: (Select one answer for each proposition: No / Mild / Moderate / Major / I don't know)

Infantile spasms

Febrile convulsions (fever fit)

Absence seizures

"Grand mal" seizures (Tonic-clonic seizures)

Atonic (drop) seizures

Simple partial seizures (focal seizures)

Complex partial seizures (focal seizures)

Nocturnal seizures

Lennox-Gastaut syndrome

Unknown type of seizures

Other: (if 'Other' is selected, please specify in free text)

30/46. Has your child had any imaging or other investigations of the head / brain? (brain scanner / MRI / etc.)

Age (by default current age) (In years)

Yes / No / I don't know (Single Choice)

Type of scan / analysis and results (Free answer)

#### SENSORY PROBLEMS

31/46. Vision problems:

Age (by default current age) (In years)

Yes / No / I don't know (Single Choice)

Please describe the type(s) of problem: (Select one answer for each proposition: Yes / No / I don't know)

Far-sighted (hypermetropia, problems with near vision)

Short-sighted (myopia, problems with far vision)

Squint / cross eyed (strabismus)

Cataract

Nystagmus (involuntary eye movement)

Other: (if 'Other' is selected, please specify in free text)

Does your relative need glasses? Yes / No / I don't know *(Single Choice)*

Far-sighted lens diopter (+):

Short-sighted lens diopter (-):

**32/46. Hearing problems:**

Age (by default current age) *(In years)*

Yes / No / I don't know *(Single Choice)*

What words best describe them? *(Select one or more answers)*

Deafness (no devices)

Recurrent ears infections

Ear malformation

Other: *(if 'Other' is selected, please specify in free text)*

What is the seriousness of the hearing impairment?

Mild (1)

Moderate (2)

Severe (3)

Profound (4)

1. Mild: Troubles in noisy situations.

2. Moderate: Can hear and understand speech only in quiet situations.

3. Severe: Cannot hear a speech without the use of amplification.

4. Profound: Cannot hear most environmental sounds without the use of amplification.

How are the hearing problems managed? *(Select one answer for each proposition: Yes / No / I don't know)*

Hearing aids

Hearing tubes (ear or tympanostomy tubes)

Other: *(if 'Other' is selected, please specify in free text)*

**33/46. Sense of smell problems:**

Age (by default current age) *(In years)*

Yes / No / I don't know *(Single Choice)*

*(Please specify in free text)*

How do you evaluate its (or their) seriousness?

Major

Moderate

Mild

**OTHER PROBLEMS**

**34/46. Sleeping disorders:**

Age (by default current age) *(In years)*

Yes / No / I don't know *(Single Choice)*

What words best describe them? *(Select one or more answers)*

Sleep apnea

Other: *(if 'Other' is selected, please specify in free text)*

How do you evaluate its (or their) seriousness?

Major

Moderate

Mild

**35/46. Dental anomalies:**

Age (by default current age) *(In years)*

Yes / No / I don't know *(Single Choice)*

What words best describe them? *(Select one or more answers)*

Too many teeth

Too few teeth

Frequent dental caries

Complex orthodontics

Other: *(if 'Other' is selected, please specify in free text)*

How do you evaluate its (or their) seriousness?

Major

Moderate

Mild

36/46. Oral / buccal problems:

Age (by default current age) (In years)

Yes / No / I don't know (Single Choice)

What words best describe them? (Select one or more answers)

Swallowing difficulties

Hypersalivation

Cleft lip

Cleft palate

Other: (if 'Other' is selected, please specify in free text)

How do you evaluate its (or their) seriousness?

Major

Moderate

Mild

37/46. Cardiac problems:

Age (by default current age) (In years)

Yes / No / I don't know (Single Choice)

What words best describe them? (Select one answer for each proposition: Yes / No / I don't know)

Cardiomyopathy

Cardiac rhythms problems (abnormal EKG)

Cardiac or cardiovascular malformation

Atrial septal defect (ASD)

Ventricular septal defect (VSD)

Patent ductus arteriosus (PDA)

Pulmonary stenosis

Tetralogy of Fallot (TOF)

Bicuspid aortic valves (BAV)

Aortic aneurysm (dilatation / broadening)

Other: (if 'Other' is selected, please specify in free text)

What treatment / surgery (if any) has been needed or is anticipated?

38/46. Vascular problems:

Age (by default current age) (In years)

Yes / No / I don't know (Single Choice)

What words best describe them? (Select one or more answers)

Hypertension

Hypotension

Coagulation problems

Other: (if 'Other' is selected, please specify in free text)

How do you evaluate its (or their) seriousness?

Major

Moderate

Mild

39/46. Respiratory and pulmonary problems:

Age (by default current age) (In years)

Yes / No / I don't know (Single Choice)

What words best describe them? (Select one answer for each proposition: Yes / No / I don't know)

Asthma

Hay fever (Allergic rhinitis)

Respiratory rate problem

Pulmonary function problem

Laryngomalacia

Tracheomalacia

Other: (if 'Other' is selected, please specify in free text)

How do you evaluate its (or their) seriousness?

Major

Moderate

Mild

40/46. Digestive problems:

Age (by default current age) (In years)

Yes / No / I don't know *(Single Choice)*

What words best describe them? *(Select one answer for each proposition: No / Mild / Moderate / Major / I don't know)*

Regurgitation

Constipation

Diarrhea

Repeated vomiting episodes

Intestinal obstruction

Other: *(if 'Other' is selected, please specify in free text)*

#### 41/46. Renal / Kidney, bladder and urogenital system problems:

Age (by default current age) *(In years)*

Yes / No / I don't know *(Single Choice)*

What words best describe them? *(Select one answer for each proposition: Yes / No / I don't know)*

Renal malformation (e.g. horseshoe kidney)

Insufficient renal function

Urinary system malformation

Frequent urinary tract infection

Vesico-ureteral reflux (VUR)

Undescended testicles (cryptorchidism)

Other: *(if 'Other' is selected, please specify in free text)*

Regularly followed by a specialist: Yes / No

Underwent surgery: Yes / No

Takes medication: Yes / No

What is the name of the drug / molecule ? (If other drugs has been previously tested, please answer this question again and adjust the period of treatment)

#### 42/46. Musculo-skeletal problems:

Age (by default current age) *(In years)*

Yes / No / I don't know *(Single Choice)*

What words best describe them? *(Select one answer for each proposition: Yes / No / I don't know)*

Malformation of the vertebral column

Scoliosis

Kyphosis (Hunchback / hump back)

Fragility (ex: broken bones)

Malformation of the upper limb

Malformation of the lower limb

Skull anomaly or malformation

Pectus excavatum (hollowed chest)

Pectus carinatum (pigeon chest)

Hip dysplasia (deformation or misalignment of the hip joint)

Pes planus (flat feet)

Pes cavum (a high arch of the feet)

Club foot (congenital talipes equinovarus CTEV)

Contractures (permanent shortening of a muscle or joint)

Joint laxity (ligamentous laxity, looseness)

Other: *(if 'Other' is selected, please specify in free text)*

Did your relative went through any surgery? *(if 'yes', specify)*

#### 43/46. Skin, nails and hair problems:

Age (by default current age) *(In years)*

What words best describe them? *(Select one answer for each proposition: Yes / No / I don't know)*

High number of moles

Skin pigmentation disorder (e.g. hypopigmentation)

Eczema, psoriasis or other skin inflammatory problems

Non-inflammatory anomalies of the skin (scar, photosensitivity, etc.)

Abnormal nails (soft, brittle, unusual shape, etc.)

Hair color different from parents and siblings

Fine wispy hair (unlike parents or siblings)

Thick hair (unlike parents or siblings)

Other: *(if 'Other' is selected, please specify in free text)*

How do you evaluate its (or their) seriousness?

Major

Moderate

Mild

44/46. Endocrine and metabolic systems problems:

Age (by default current age) (In years)

Yes / No / I don't know (Single Choice)

What words best describe them? (Select one or more answers)

Hyperthyroidism (over-active thyroid)

Hypothyroidism (under-active thyroid)

Growth hormone deficiency

Other: (if 'Other' is selected, please specify in free text)

Has your relative been diagnosed with any disorder of the endocrine or metabolic systems? (if 'yes', specify)

If applicable, what was the age at first menstruation? (In years)

45/46. Blood and immune system problems:

Age (by default current age) (In years)

Does / did your relative have recurrent infections?

Yes, but only ear / nose / throat infections

Yes (if 'yes', specify)

No

I don't know

Has your relative been diagnosed with any disorder of the blood or immune system?

46/46. Cancer development:

Age (by default current age) (In years)

Yes / No / I don't know (Single Choice)

(if 'yes', specify)
